# Supplementary material for: Influence of hybrid nano-filler on the crystallization behaviour and interfacial interaction in polyamide 6 based hybrid nano-composites
Source: Royal Society of Chemistry journal article supplement (doi:10.1039/c5cp00018a), 2015-01-01
Supplement: c5cp00018a1.pdf [file c5cp00018a1.pdf]

### Supplementary Figures

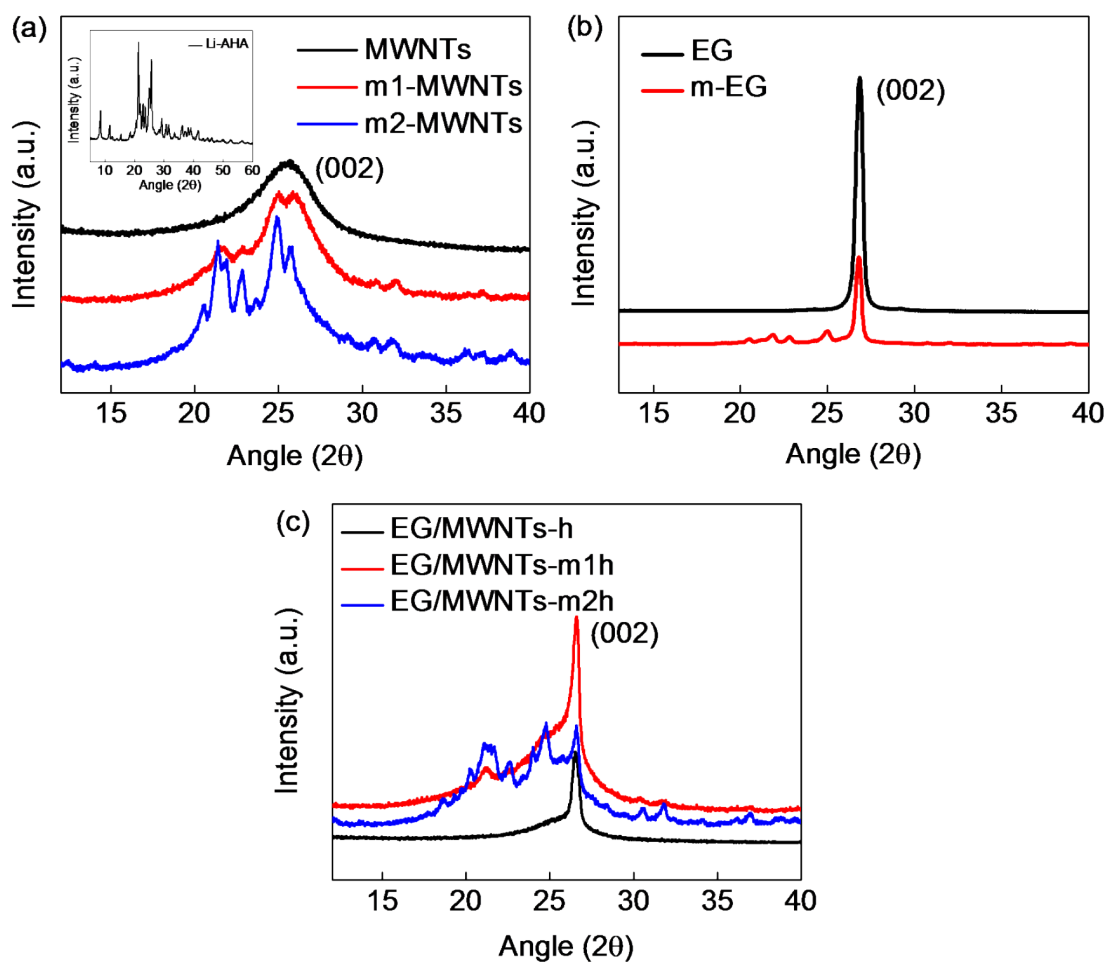

**Supplementary Figure 1: WAXD pattern of (a) MWNTs, (b) EG and (c) EG/MWNTs-h hybrid in the presence of Li-AHA**

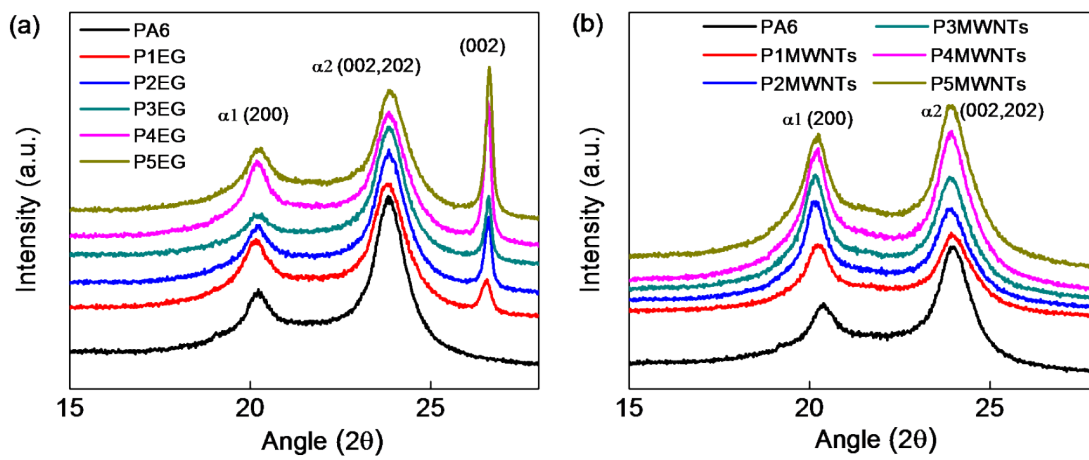

Supplementary Figure 2: WAXD pattern of PA6 composites of (a) EG and (b) MWNTs

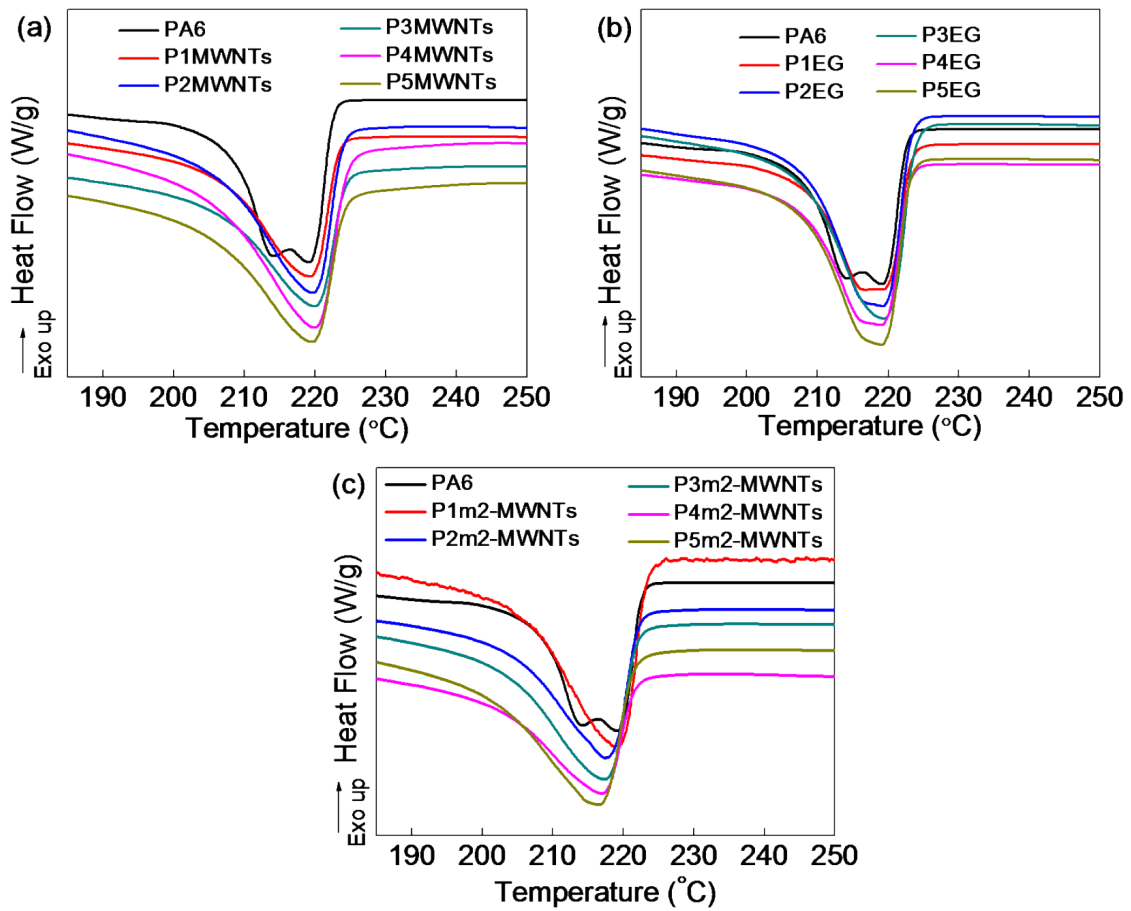

**Supplementary Figure 3: Melting endotherm of PA6 composites of (a) MWNTs, (b) EG and (c) m2-MWNTs**

**Supplementary Table 1: FWHM analysis from WAXD of EG peak of PA6 composite**

| <b>Sample</b>  | <b>FWHM (°)</b> |
|----------------|-----------------|
| P1EG           | 0.31            |
| P2EG           | 0.21            |
| P3EG           | 0.20            |
| P4EG           | 0.19            |
| P5EG           | 0.19            |
| P1EG/MWNTs-h   | --              |
| P2EG/MWNTs-h   | --              |
| P3EG/MWNTs-h   | 0.19            |
| P4EG/MWNTs-h   | 0.22            |
| P5EG/MWNTs-h   | 0.20            |
| P1EG/MWNTs-m1h | --              |
| P2EG/MWNTs-m1h | --              |
| P3EG/MWNTs-m1h | 0.19            |
| P4EG/MWNTs-m1h | 0.20            |
| P5EG/MWNTs-m1h | 0.20            |
